# Supplementary material
Source: publisher figshare collection journal article supplement (https://sage.figshare.com/ndownloader/files/13765295)
Supplement: Supplementary file 1 [file 13765295]

| Supplementary Table 1. LIFEware™ characteristics at baseline between those individuals who reported fatigue and those who did not. |                      |                             |                              |                      |                      |                          |                |
|------------------------------------------------------------------------------------------------------------------------------------|----------------------|-----------------------------|------------------------------|----------------------|----------------------|--------------------------|----------------|
| Characteristic                                                                                                                     | Fatigued,<br>N=2,714 | Not<br>Fatigued,<br>N=2,714 | OR (95% CI)                  | Characteristic       | Fatigued,<br>N=2,714 | Not Fatigued,<br>N=2,714 | OR (95% CI)    |
| Get up                                                                                                                             |                      |                             |                              | Bladder              |                      |                          |                |
| Lots of difficulties - Unable                                                                                                      | 896 (33.2%)          | 542 (20.0%)                 |                              | Moderate - Severe    | 875 (32.6%)          | 316 (11.8%)              | 5.4 (4.6-6.4)* |
| No – Some difficulties                                                                                                             | 1805 (66.8%)         | 2165 (80.0%)                | 2.6 (2.2-3.0)*<br>1.00 (Ref) | Mild - Moderate      | 714 (26.6%)          | 625 (23.3%)              | 2.0 (1.8-2.3)* |
| Stairs                                                                                                                             |                      |                             |                              | No - Mild            | 1098 (40.9%)         | 1747 (65.0%)             | 1.00 (Ref)     |
| Lots of difficulties - Unable                                                                                                      | 1333 (49.4%)         | 822 (30.3%)                 |                              | Vision               |                      |                          |                |
| No – Some difficulties                                                                                                             | 1365 (50.6%)         | 1887 (69.7%)                | 3.1 (2.7-3.6)*<br>1.00 (Ref) | Moderate - Severe    | 854 (31.6%)          | 233 (8.6%)               | 6.3 (5.3-7.5)* |
| Stand                                                                                                                              |                      |                             |                              | Mild – Moderate      | 759 (28.1%)          | 653 (24.1%)              | 2.0 (1.7-2.2)* |
| Lots of difficulties- Unable                                                                                                       | 1789 (66.4%)         | 1069 (39.5%)                |                              | No - Mild            | 1092 (40.4%)         | 1822 (67.3%)             | 1.00 (Ref)     |
| No – Some difficulties                                                                                                             | 906 (33.6%)          | 1639 (60.5%)                | 4.5 (4.0-5.2)*<br>1.00 (Ref) | Loneliness           |                      |                          |                |
| Drive                                                                                                                              |                      |                             |                              | Moderate - Extremely | 666 (24.7%)          | 342 (12.0%)              | 2.4 (2.1-2.8)* |
| Lots of difficulties- Unable                                                                                                       | 607 (22.5%)          | 415 (15.3%)                 | 1.8 (1.6-2.2)*               | No - Mildly          | 2033 (75.3%)         | 2382 (88.0%)             | 1.00 (Ref)     |
| No – Some difficulties                                                                                                             | 1757 (65.1%)         | 1991 (73.6%)                | 1.00 (Ref)                   | Pessimism            |                      |                          |                |
| Not applicable                                                                                                                     | 335 (12.4%)          | 300 (11.1%)                 | 1.4 (1.1-1.6)*               | Moderate – Extremely | 1174 (43.5%)         | 636 (23.6%)              | 2.5 (2.2-2.8)* |
| Pain                                                                                                                               |                      |                             |                              | No - Mildly          | 1525 (56.5%)         | 2061 (76.4%)             | 1.00 (Ref)     |
| Pain                                                                                                                               | 1797 (66.4%)         | 1127 (41.6%)                |                              | Tense                |                      |                          |                |
| No                                                                                                                                 | 909 (33.6%)          | 1584 (58.4%)                | 2.8 (2.5-3.1)*<br>1.00 (Ref) | Moderate – Extremely | 1534 (57.3%)         | 881 (32.7%)              | 2.8 (2.5-3.2)* |
| Pain extent                                                                                                                        |                      |                             | 2.4 (2.0-2.8)*               | No – Mildly          | 1144 (42.7%)         | 1812 (67.3%)             | 1.00 (Ref)     |

|                            |                 |                 |                |                      |                 |              |                     |
|----------------------------|-----------------|-----------------|----------------|----------------------|-----------------|--------------|---------------------|
| Discomforting-Excruciating | 1425<br>(79.2%) | 700 (62.4%)     | 1.00 (Ref)     | Panic                |                 |              |                     |
| Mild pain                  | 374 (20.8%)     | 422 (37.6%)     |                | Moderate – Extremely | 453 (16.8%)     | 188 (7.0%)   | 2.7 (2.3-           |
| Upper Limbs                |                 |                 |                | No - Mildly          | 2242<br>(83.2%) | 2515 (93.0%) | 3.3)*<br>1.00 (Ref) |
| Moderate - Severe          | 434 (16.1%)     | 157 (5.8%)      | 4.6 (3.8-5.7)* | Annoyed              |                 |              |                     |
| Mild - Moderate            | 668 (24.8%)     | 336 (12.4%)     | 3.0 (2.6-3.5)* | Moderate – Extremely | 1417<br>(52.7%) | 711 (26.4%)  | 3.2 (2.8-           |
| No - Mild                  | 1596<br>(59.2%) | 2211<br>(81.8%) | 1.00 (Ref)     | No – Mildly          | 1274<br>(47.3%) | 1987 (73.6%) | 3.6)*<br>1.00 (Ref) |
| Lower Limbs                |                 |                 |                | Morbid Mood          |                 |              |                     |
| Moderate - Severe          | 1013<br>(37.6%) | 580 (21.5%)     | 6.4 (5.3-7.6)* | Moderate – Extremely | 667 (24.8%)     | 316 (11.7%)  | 2.5 (2.2-           |
| Mild - Moderate            | 823 (30.6%)     | 528 (19.6%)     | 3.9 (3.4-4.6)* | No - Mildly          | 2027<br>(75.2%) | 2385 (88.3%) | 2.9)*<br>1.00 (Ref) |
| No - Mild                  | 856 (31.8%)     | 1588<br>(58.9%) | 1.00 (Ref)     | Feelings of Guilt    |                 |              |                     |
| Bowel                      |                 |                 |                | Moderate- Extremely  | 671 (24.8%)     | 323 (11.9%)  | 2.5 (2.1-           |
| Moderate - Severe          | 574 (21.3%)     | 163 (6.0%)      | 5.1 (4.2-6.1)* | No - Mildly          | 2032<br>(75.2%) | 2381 (88.1%) | 2.8)*<br>1.00 (Ref) |
| Mild - Moderate            | 490 (18.2%)     | 386 (14.3%)     | 1.8 (1.5-2.1)* |                      |                 |              |                     |
| No - Mild                  | 1625<br>(60.4%) | 2148<br>(79.6%) | 1.00 (Ref)     |                      |                 |              |                     |

Ref=Reference; Odds ratios and confidence intervals are for logistic regression models comparing baseline patient-reported outcomes by fatigue status, and are adjusted for age at enrollment, disease duration, EDSS at enrollment, DMT use, and MS type at enrollment. P-values are also adjusted for multiple comparisons. \*p<0.05.
